# Supplementary material
Source: publisher figshare collection journal article supplement (https://acs.figshare.com/ndownloader/files/4257046)
Supplement: Supplementary file 1 [file 4257046]

 
data_Complex2f
 
_audit_creation_method            SHELXL-97 
_audit_update_record 
; 
? 
; 
 
_chemical_name_systematic 
; 
? 
; 
 
_chemical_name_common            ? 
_chemical_melting_point          ? 
_chemical_formula_moiety         'C30 H40 N O P Pd' 
_chemical_formula_sum 
 'C30 H40 N O P Pd' 
_chemical_formula_structural     ? 
_chemical_formula_weight          568.00 
 
_chemical_absolute_configuration ad 
_chemical_formula_iupac          ? 
_chemical_formula_analytical     ? 
_chemical_compound_source        ? 
 
loop_ 
 _atom_type_symbol 
 _atom_type_description 
 _atom_type_scat_dispersion_real 
 _atom_type_scat_dispersion_imag 
 _atom_type_scat_source 
 'C'  'C'   0.0033   0.0016 
 'International Tables Vol C Tables 4.2.6.8 and 6.1.1.4' 
 'H'  'H'   0.0000   0.0000 
 'International Tables Vol C Tables 4.2.6.8 and 6.1.1.4' 
 'N'  'N'   0.0061   0.0033 
 'International Tables Vol C Tables 4.2.6.8 and 6.1.1.4' 
 'O'  'O'   0.0106   0.0060 
 'International Tables Vol C Tables 4.2.6.8 and 6.1.1.4' 
 'P'  'P'   0.1023   0.0942 
 'International Tables Vol C Tables 4.2.6.8 and 6.1.1.4' 
 'Pd'  'Pd'  -0.9988   1.0072 
 'International Tables Vol C Tables 4.2.6.8 and 6.1.1.4' 
 
_symmetry_cell_setting           'Orthorhombic' 
_symmetry_space_group_name_H-M   'Pca2(1) ' 
_symmetry_space_group_name_Hall  'P 2c -2ac' 
loop_ 
 _symmetry_equiv_pos_as_xyz 
 'x, y, z' 
 '-x, -y, z+1/2' 
 'x+1/2, -y, z' 
 '-x+1/2, y, z+1/2' 
 
_cell_length_a                    19.6710(14) 
_cell_length_b                    8.7480(7) 
_cell_length_c                    15.9812(11) 
_cell_angle_alpha                 90.00 
_cell_angle_beta                  90.00 
_cell_angle_gamma                 90.00 
_cell_volume                      2750.1(4) 
_cell_formula_units_Z             4 
_cell_measurement_temperature     193(2) 
_cell_measurement_reflns_used    3392 
_cell_measurement_theta_min        2.43 
_cell_measurement_theta_max       21.32 
_exptl_crystal_description       'plate' 
_exptl_crystal_colour            'orange' 
_exptl_crystal_size_max          0.216 
_exptl_crystal_size_mid          0.161 
_exptl_crystal_size_min          0.092 
_exptl_crystal_density_meas       ? 
_exptl_crystal_density_diffrn     1.372 
_exptl_crystal_density_method    'not measured' 
_exptl_crystal_F_000              1184 
_exptl_crystal_id                Complex2f 
 
_exptl_crystal_preparation 
; 
The data crystal was mounted using oil (Parantone-N, Exxon) to a 
0.3 mm cryo-loop (Hampton Research) with the (1 2 2) scattering 
planes roughly normal to the spindle axis. 
; 
_exptl_absorpt_coefficient_mu     0.755 
_exptl_absorpt_correction_type   'integration' 
_exptl_absorpt_correction_T_min  0.8869 
_exptl_absorpt_correction_T_max  0.9593 
_exptl_absorpt_process_details   'SHELXTL/XPREP V2005/2 (Bruker, 2005)' 
 
_exptl_special_details 
; 
One distinct cell was identified using APEX2 (Bruker, 2004). Five 
frame series were integrated and filtered for statistical outliers 
using SAINT (Bruker, 2005) then corrected for absorption by 
integration using SHELXTL/XPREP V2005/2 (Bruker, 2005) before using 
SAINT/SADABS (Bruker, 2005) to sort, merge, and scale 
the combined data. No decay correction was applied. 
; 
 
_diffrn_ambient_temperature       193(2) 
_diffrn_radiation_wavelength      0.71073 
_diffrn_radiation_wavelength_id  Complex2f 
_diffrn_radiation_type           'MoK\a' 
_diffrn_radiation_source         'fine-focus sealed tube' 
_diffrn_radiation_monochromator  'graphite' 
_diffrn_measurement_device_type   ? 
_diffrn_measurement_device       'Bruker Kappa/ApexII CCD' 
_diffrn_measurement_method       'profile data from \f and \w scans' 
_diffrn_detector_area_resol_mean  ? 
_diffrn_standards_number         ? 
_diffrn_standards_interval_count  ? 
_diffrn_standards_interval_time  ? 
 
_diffrn_standards_decay_%        ? 
_diffrn_reflns_number            26326 
 
_diffrn_reflns_av_R_equivalents   0.0743 
_diffrn_reflns_av_sigmaI/netI     0.0657 
_diffrn_reflns_limit_h_min        -22 
_diffrn_reflns_limit_h_max        23 
_diffrn_reflns_limit_k_min        -10 
_diffrn_reflns_limit_k_max        10 
_diffrn_reflns_limit_l_min        -19 
_diffrn_reflns_limit_l_max        19 
_diffrn_reflns_theta_min          2.07 
_diffrn_reflns_theta_max          25.38 
_reflns_number_total              4958 
_reflns_number_gt                 3795 
_reflns_threshold_expression      >2sigma(I) 
 
_computing_data_collection       'APEX2 V2.0-1 (Bruker, 2004)' 
 
_computing_cell_refinement       'SAINT V7.23A (Bruker, 2005)' 
_computing_data_reduction 
; 
SAINT V7.23A, XPREP V2005/2, SADABS V2007/4, TWINABS V2007/5 
(Bruker, 2005 & 2007) 
; 
_computing_structure_solution    'SHELXTL V6.12 (Bruker, 2005)' 
_computing_structure_refinement  'SHELXTL V6.12 (Bruker, 2005)' 
_computing_molecular_graphics 
; 
SHELXTL V6.12 (Bruker, 2005), CrystalMaker v2.1.3 (CrystalMaker, 1994) 
; 
_computing_publication_material  'XCIF V6.12 (Bruker, 2005)' 
 
_refine_special_details 
; 
Structure was phased by direct methods (Sheldrick, 
2008). Systematic conditions suggested the ambiguous space group. 
The space group choice was confirmed by successful convergence of the 
full-matrix least-squares refinement on F^2^.  The highest peaks in 
the final difference Fourier map were in the vicinity of the palladium 
atom; the final map had no other significant features. A final analysis of 
variance between observed and calculated structure factors showed little 
dependence on amplitude and resolution. 
 
The acicular parent crystals were extremely difficult to cut. The data 
crystal was much longer than ideal because the cleavage planes in this 
crystals could not be seen to make a nice cut. 
 
; 
 
_refine_ls_structure_factor_coef  Fsqd 
_refine_ls_matrix_type            full 
_refine_ls_weighting_scheme       calc 
_refine_ls_weighting_details 
 'calc w=1/[\s^2^(Fo^2^)+(0.0326P)^2^+0.0000P] where P=(Fo^2^+2Fc^2^)/3' 
_atom_sites_solution_primary      direct 
_atom_sites_solution_secondary    difmap 
_atom_sites_solution_hydrogens    geom 
_refine_ls_hydrogen_treatment    noref 
_refine_ls_extinction_method      none 
_refine_ls_extinction_coef        ? 
_refine_ls_abs_structure_details 'Flack (1983),  2333 Friedels' 
_refine_ls_abs_structure_Flack    -0.02(3) 
_refine_ls_number_reflns          4958 
_refine_ls_number_parameters      428 
_refine_ls_number_restraints      370 
_refine_ls_R_factor_all           0.0639 
_refine_ls_R_factor_gt            0.0387 
_refine_ls_wR_factor_ref          0.0773 
_refine_ls_wR_factor_gt           0.0699 
_refine_ls_goodness_of_fit_ref    1.009 
_refine_ls_restrained_S_all       0.980 
_refine_ls_shift/su_max           0.001 
_refine_ls_shift/su_mean          0.000 
 
loop_ 
 _atom_site_label 
 _atom_site_type_symbol 
 _atom_site_fract_x 
 _atom_site_fract_y 
 _atom_site_fract_z 
 _atom_site_U_iso_or_equiv 
 _atom_site_adp_type 
 _atom_site_occupancy 
 _atom_site_symmetry_multiplicity 
 _atom_site_calc_flag 
 _atom_site_refinement_flags 
 _atom_site_disorder_assembly 
 _atom_site_disorder_group 
Pd1 Pd 0.715214(14) 0.32696(4) 0.96052(4) 0.02845(10) Uani 1 1 d D . . 
P1 P 0.82693(5) 0.37714(14) 0.96505(15) 0.0339(3) Uani 1 1 d D A . 
N1 N 0.60997(15) 0.2932(4) 0.9621(5) 0.0325(8) Uani 1 1 d . A . 
O1 O 0.723(3) 0.115(4) 0.883(3) 0.046(3) Uani 0.161(12) 1 d PDU A 1 
C1 C 0.714(3) 0.096(5) 0.794(3) 0.048(3) Uani 0.161(12) 1 d PDU A 1 
H1A H 0.6875 0.1823 0.7705 0.058 Uiso 0.161(12) 1 calc PR A 1 
H1B H 0.7583 0.0904 0.7656 0.058 Uiso 0.161(12) 1 calc PR A 1 
C2 C 0.677(2) -0.046(5) 0.784(2) 0.052(3) Uani 0.161(12) 1 d PDU A 1 
H2A H 0.7085 -0.1316 0.7732 0.062 Uiso 0.161(12) 1 calc PR A 1 
H2B H 0.6442 -0.0386 0.7371 0.062 Uiso 0.161(12) 1 calc PR A 1 
C3 C 0.6398(19) -0.070(4) 0.865(2) 0.051(3) Uani 0.161(12) 1 d PDU A 1 
H3A H 0.5974 -0.0097 0.8676 0.062 Uiso 0.161(12) 1 calc PR A 1 
H3B H 0.6292 -0.1796 0.8743 0.062 Uiso 0.161(12) 1 calc PR A 1 
C4 C 0.689(3) -0.016(8) 0.924(2) 0.046(3) Uani 0.161(12) 1 d PDU A 1 
H4A H 0.7226 -0.0968 0.9370 0.055 Uiso 0.161(12) 1 calc PR A 1 
H4B H 0.6668 0.0166 0.9765 0.055 Uiso 0.161(12) 1 calc PR A 1 
O1B O 0.7189(5) 0.1212(8) 0.8779(6) 0.0428(13) Uani 0.839(12) 1 d PDU A 2 
C1B C 0.7059(5) 0.1385(9) 0.7893(6) 0.0472(18) Uani 0.839(12) 1 d PDU A 2 
H1C H 0.7487 0.1304 0.7571 0.057 Uiso 0.839(12) 1 calc PR A 2 
H1D H 0.6849 0.2392 0.7778 0.057 Uiso 0.839(12) 1 calc PR A 2 
C2B C 0.6598(4) 0.0161(10) 0.7667(4) 0.0528(19) Uani 0.839(12) 1 d PDU A 2 
H2C H 0.6698 -0.0216 0.7096 0.063 Uiso 0.839(12) 1 calc PR A 2 
H2D H 0.6120 0.0519 0.7685 0.063 Uiso 0.839(12) 1 calc PR A 2 
C3B C 0.6715(5) -0.1083(9) 0.8305(6) 0.057(2) Uani 0.839(12) 1 d PDU A 2 
H3C H 0.6308 -0.1736 0.8374 0.069 Uiso 0.839(12) 1 calc PR A 2 
H3D H 0.7109 -0.1730 0.8155 0.069 Uiso 0.839(12) 1 calc PR A 2 
C4B C 0.6847(7) -0.0190(14) 0.9047(5) 0.0470(16) Uani 0.839(12) 1 d PDU A 2 
H4C H 0.7140 -0.0769 0.9439 0.056 Uiso 0.839(12) 1 calc PR A 2 
H4D H 0.6415 0.0059 0.9335 0.056 Uiso 0.839(12) 1 calc PR A 2 
C5 C 0.5755(2) 0.3338(6) 0.8896(3) 0.0321(13) Uani 1 1 d . . . 
C6 C 0.5966(3) 0.4599(7) 0.8436(3) 0.0434(14) Uani 1 1 d . A . 
H6A H 0.6334 0.5197 0.8639 0.052 Uiso 1 1 calc R . . 
C7 C 0.5656(3) 0.5014(7) 0.7688(3) 0.0556(17) Uani 1 1 d . . . 
H7A H 0.5811 0.5891 0.7394 0.067 Uiso 1 1 calc R A . 
C8 C 0.5131(3) 0.4172(8) 0.7372(3) 0.0568(18) Uani 1 1 d . A . 
H8A H 0.4915 0.4464 0.6865 0.068 Uiso 1 1 calc R . . 
C9 C 0.4919(3) 0.2897(8) 0.7800(4) 0.0505(18) Uani 1 1 d . . . 
H9A H 0.4560 0.2288 0.7582 0.061 Uiso 1 1 calc R A . 
C10 C 0.5226(3) 0.2497(10) 0.8542(4) 0.049(2) Uani 1 1 d . A . 
H10A H 0.5070 0.1609 0.8826 0.058 Uiso 1 1 calc R . . 
C11 C 0.5767(2) 0.2367(6) 1.0311(3) 0.0287(13) Uani 1 1 d . . . 
C12 C 0.5072(3) 0.2528(8) 1.0465(4) 0.0323(15) Uani 1 1 d . A . 
H12A H 0.4797 0.3041 1.0065 0.039 Uiso 1 1 calc R . . 
C13 C 0.4782(3) 0.1973(6) 1.1167(4) 0.0419(15) Uani 1 1 d . . . 
H13A H 0.4307 0.2100 1.1248 0.050 Uiso 1 1 calc R A . 
C14 C 0.5156(3) 0.1231(6) 1.1766(3) 0.0422(15) Uani 1 1 d . A . 
H14A H 0.4947 0.0838 1.2256 0.051 Uiso 1 1 calc R . . 
C15 C 0.5832(3) 0.1076(6) 1.1635(3) 0.0401(14) Uani 1 1 d . . . 
H15A H 0.6098 0.0562 1.2044 0.048 Uiso 1 1 calc R A . 
C16 C 0.6146(2) 0.1633(6) 1.0936(3) 0.0356(12) Uani 1 1 d . A . 
H16A H 0.6623 0.1522 1.0873 0.043 Uiso 1 1 calc R . . 
C17 C 0.7110(2) 0.5096(6) 1.0349(3) 0.0304(12) Uani 1 1 d . A . 
C18 C 0.7691(2) 0.5635(6) 1.0753(3) 0.0382(14) Uani 1 1 d . . . 
C19 C 0.7656(3) 0.6947(7) 1.1245(4) 0.0476(16) Uani 1 1 d . A . 
H19A H 0.8052 0.7291 1.1528 0.057 Uiso 1 1 calc R . . 
C20 C 0.7063(3) 0.7749(7) 1.1331(4) 0.0496(15) Uani 1 1 d . . . 
H20A H 0.7052 0.8656 1.1658 0.060 Uiso 1 1 calc R A . 
C21 C 0.6486(3) 0.7241(6) 1.0944(3) 0.0415(14) Uani 1 1 d . A . 
H21A H 0.6071 0.7783 1.1012 0.050 Uiso 1 1 calc R . . 
C22 C 0.6505(2) 0.5936(6) 1.0453(3) 0.0354(13) Uani 1 1 d . . . 
H22A H 0.6102 0.5602 1.0181 0.043 Uiso 1 1 calc R A . 
C23 C 0.8348(3) 0.4815(8) 1.0639(4) 0.0451(18) Uani 1 1 d . A . 
H23A H 0.8429 0.4100 1.1109 0.054 Uiso 1 1 calc R . . 
H23B H 0.8730 0.5551 1.0613 0.054 Uiso 1 1 calc R . . 
C24 C 0.854(5) 0.513(6) 0.885(3) 0.052(4) Uani 0.17(5) 1 d PDU A 1 
H24A H 0.9040 0.5159 0.8931 0.062 Uiso 0.17(5) 1 calc PR A 1 
C25 C 0.836(4) 0.684(6) 0.872(6) 0.055(6) Uani 0.17(5) 1 d PDU A 1 
H25A H 0.8611 0.7229 0.8227 0.082 Uiso 0.17(5) 1 calc PR A 1 
H25B H 0.8500 0.7428 0.9213 0.082 Uiso 0.17(5) 1 calc PR A 1 
H25C H 0.7875 0.6959 0.8627 0.082 Uiso 0.17(5) 1 calc PR A 1 
C26 C 0.847(4) 0.432(8) 0.799(5) 0.053(6) Uani 0.17(5) 1 d PDU A 1 
H26A H 0.8761 0.4831 0.7575 0.079 Uiso 0.17(5) 1 calc PR A 1 
H26B H 0.7996 0.4358 0.7798 0.079 Uiso 0.17(5) 1 calc PR A 1 
H26C H 0.8611 0.3246 0.8041 0.079 Uiso 0.17(5) 1 calc PR A 1 
C24B C 0.8570(9) 0.5045(14) 0.8826(7) 0.049(2) Uani 0.83(5) 1 d PDU A 2 
H24B H 0.9078 0.5002 0.8796 0.059 Uiso 0.83(5) 1 calc PR A 2 
C25B C 0.8341(7) 0.6696(13) 0.9021(13) 0.059(3) Uani 0.83(5) 1 d PDU A 2 
H25D H 0.8459 0.7364 0.8550 0.089 Uiso 0.83(5) 1 calc PR A 2 
H25E H 0.8571 0.7058 0.9528 0.089 Uiso 0.83(5) 1 calc PR A 2 
H25F H 0.7848 0.6716 0.9108 0.089 Uiso 0.83(5) 1 calc PR A 2 
C26B C 0.8263(10) 0.460(2) 0.7963(9) 0.062(3) Uani 0.83(5) 1 d PDU A 2 
H26D H 0.8467 0.5228 0.7524 0.092 Uiso 0.83(5) 1 calc PR A 2 
H26E H 0.7770 0.4761 0.7973 0.092 Uiso 0.83(5) 1 calc PR A 2 
H26F H 0.8358 0.3516 0.7850 0.092 Uiso 0.83(5) 1 calc PR A 2 
C27 C 0.8881(7) 0.2214(15) 0.9741(8) 0.046(2) Uani 0.68(5) 1 d PDU A 1 
C28 C 0.8651(10) 0.120(2) 1.0453(13) 0.061(4) Uani 0.68(5) 1 d PDU A 1 
H28A H 0.8949 0.0300 1.0488 0.092 Uiso 0.68(5) 1 calc PR A 1 
H28B H 0.8182 0.0860 1.0352 0.092 Uiso 0.68(5) 1 calc PR A 1 
H28C H 0.8671 0.1766 1.0980 0.092 Uiso 0.68(5) 1 calc PR A 1 
C29 C 0.9585(6) 0.290(2) 0.9936(12) 0.057(3) Uani 0.68(5) 1 d PDU A 1 
H29A H 0.9935 0.2113 0.9865 0.086 Uiso 0.68(5) 1 calc PR A 1 
H29B H 0.9593 0.3273 1.0514 0.086 Uiso 0.68(5) 1 calc PR A 1 
H29C H 0.9676 0.3751 0.9553 0.086 Uiso 0.68(5) 1 calc PR A 1 
C30 C 0.8938(9) 0.124(2) 0.8938(10) 0.054(4) Uani 0.68(5) 1 d PDU A 1 
H30A H 0.9223 0.0343 0.9048 0.081 Uiso 0.68(5) 1 calc PR A 1 
H30B H 0.9143 0.1852 0.8491 0.081 Uiso 0.68(5) 1 calc PR A 1 
H30C H 0.8483 0.0904 0.8765 0.081 Uiso 0.68(5) 1 calc PR A 1 
C27B C 0.8917(15) 0.214(3) 0.9718(15) 0.049(3) Uani 0.32(5) 1 d PDU A 2 
C28B C 0.8569(16) 0.087(3) 1.020(2) 0.053(5) Uani 0.32(5) 1 d PDU A 2 
H28D H 0.8845 -0.0063 1.0164 0.079 Uiso 0.32(5) 1 calc PR A 2 
H28E H 0.8120 0.0673 0.9954 0.079 Uiso 0.32(5) 1 calc PR A 2 
H28F H 0.8517 0.1169 1.0785 0.079 Uiso 0.32(5) 1 calc PR A 2 
C29B C 0.9618(14) 0.248(5) 1.011(2) 0.055(5) Uani 0.32(5) 1 d PDU A 2 
H29D H 0.9853 0.1515 1.0230 0.082 Uiso 0.32(5) 1 calc PR A 2 
H29E H 0.9555 0.3045 1.0639 0.082 Uiso 0.32(5) 1 calc PR A 2 
H29F H 0.9890 0.3095 0.9727 0.082 Uiso 0.32(5) 1 calc PR A 2 
C30B C 0.904(2) 0.161(6) 0.8804(13) 0.059(5) Uani 0.32(5) 1 d PDU A 2 
H30D H 0.9428 0.0901 0.8790 0.089 Uiso 0.32(5) 1 calc PR A 2 
H30E H 0.9142 0.2498 0.8452 0.089 Uiso 0.32(5) 1 calc PR A 2 
H30F H 0.8635 0.1092 0.8592 0.089 Uiso 0.32(5) 1 calc PR A 2 
 
loop_ 
 _atom_site_aniso_label 
 _atom_site_aniso_U_11 
 _atom_site_aniso_U_22 
 _atom_site_aniso_U_33 
 _atom_site_aniso_U_23 
 _atom_site_aniso_U_13 
 _atom_site_aniso_U_12 
Pd1 0.02390(14) 0.03141(19) 0.03003(15) -0.0023(4) -0.0019(3) -0.00187(16) 
P1 0.0232(5) 0.0393(7) 0.0393(7) -0.0071(13) -0.0021(11) 0.0038(5) 
N1 0.0282(16) 0.034(2) 0.0353(19) 0.001(4) -0.018(4) -0.0077(15) 
O1 0.057(5) 0.039(5) 0.041(5) -0.012(5) -0.004(5) 0.001(4) 
C1 0.059(5) 0.041(5) 0.044(4) -0.013(5) -0.007(5) 0.004(5) 
C2 0.066(6) 0.041(6) 0.049(5) -0.019(5) -0.007(5) 0.002(5) 
C3 0.064(6) 0.038(6) 0.052(6) -0.016(5) -0.003(5) -0.001(5) 
C4 0.059(5) 0.033(5) 0.045(5) -0.014(5) -0.006(5) -0.002(5) 
O1B 0.050(3) 0.041(2) 0.037(3) -0.011(2) -0.006(2) 0.001(2) 
C1B 0.061(4) 0.042(4) 0.039(3) -0.011(3) -0.007(3) 0.009(3) 
C2B 0.064(4) 0.043(4) 0.050(3) -0.019(3) -0.014(3) 0.007(3) 
C3B 0.070(4) 0.043(4) 0.060(4) -0.019(3) -0.004(4) -0.003(4) 
C4B 0.063(3) 0.032(3) 0.046(4) -0.010(4) -0.002(4) -0.002(3) 
C5 0.028(3) 0.030(4) 0.038(3) -0.009(3) -0.001(2) -0.004(3) 
C6 0.045(3) 0.054(4) 0.032(3) 0.011(3) -0.004(2) -0.009(3) 
C7 0.049(3) 0.065(5) 0.053(4) 0.010(4) 0.003(3) -0.004(3) 
C8 0.046(4) 0.092(6) 0.032(3) -0.006(3) -0.005(3) 0.004(4) 
C9 0.037(3) 0.071(6) 0.044(4) -0.015(4) -0.007(3) -0.005(3) 
C10 0.045(4) 0.056(5) 0.045(4) -0.012(3) 0.003(3) -0.004(4) 
C11 0.027(3) 0.019(3) 0.040(3) -0.002(3) 0.001(2) -0.005(3) 
C12 0.029(3) 0.030(4) 0.038(3) -0.001(3) 0.001(3) 0.000(3) 
C13 0.030(3) 0.041(4) 0.055(4) -0.008(3) 0.006(3) 0.001(3) 
C14 0.045(3) 0.046(4) 0.035(3) 0.005(3) 0.010(3) -0.003(3) 
C15 0.046(3) 0.032(3) 0.042(3) 0.006(3) 0.001(3) 0.004(3) 
C16 0.030(3) 0.038(3) 0.039(3) 0.002(3) -0.001(2) -0.001(3) 
C17 0.027(2) 0.035(3) 0.030(2) 0.004(2) 0.007(2) -0.005(3) 
C18 0.027(3) 0.043(4) 0.045(3) -0.012(3) 0.002(2) 0.000(2) 
C19 0.039(3) 0.053(4) 0.052(3) -0.021(3) -0.004(2) -0.008(3) 
C20 0.046(4) 0.046(4) 0.056(4) -0.019(3) 0.002(3) -0.003(3) 
C21 0.041(3) 0.037(4) 0.046(3) 0.000(3) 0.012(3) 0.010(3) 
C22 0.033(3) 0.032(3) 0.041(3) 0.001(3) 0.004(2) 0.003(3) 
C23 0.023(3) 0.060(5) 0.053(4) -0.022(4) -0.007(3) 0.004(3) 
C24 0.032(7) 0.060(7) 0.062(7) 0.014(7) 0.007(7) -0.003(7) 
C25 0.036(10) 0.062(9) 0.067(12) 0.010(10) 0.015(12) 0.000(10) 
C26 0.035(12) 0.066(11) 0.057(10) 0.015(9) 0.010(11) -0.002(11) 
C24B 0.027(4) 0.057(4) 0.063(4) 0.014(4) 0.006(3) -0.004(4) 
C25B 0.057(5) 0.049(5) 0.072(7) 0.022(5) 0.015(5) -0.007(4) 
C26B 0.052(7) 0.079(7) 0.054(4) 0.022(5) 0.004(5) -0.002(5) 
C27 0.042(4) 0.044(4) 0.053(5) -0.005(4) -0.009(4) 0.020(3) 
C28 0.074(7) 0.054(7) 0.056(7) 0.010(6) -0.018(6) 0.029(6) 
C29 0.040(4) 0.073(8) 0.058(7) 0.001(5) -0.024(4) 0.037(5) 
C30 0.042(6) 0.055(9) 0.066(6) -0.008(6) -0.003(5) 0.016(6) 
C27B 0.045(5) 0.048(6) 0.055(6) -0.007(6) -0.013(6) 0.020(5) 
C28B 0.059(8) 0.046(9) 0.053(10) -0.005(9) -0.026(8) 0.020(7) 
C29B 0.044(8) 0.064(11) 0.056(10) 0.002(9) -0.022(7) 0.026(8) 
C30B 0.062(10) 0.050(11) 0.066(7) -0.019(8) -0.016(8) 0.011(9) 
 
_geom_special_details 
; 
 All esds (except the esd in the dihedral angle between two l.s. planes) 
 are estimated using the full covariance matrix.  The cell esds are taken 
 into account individually in the estimation of esds in distances, angles 
 and torsion angles; correlations between esds in cell parameters are only 
 used when they are defined by crystal symmetry.  An approximate (isotropic) 
 treatment of cell esds is used for estimating esds involving l.s. planes. 
; 
 
loop_ 
 _geom_bond_atom_site_label_1 
 _geom_bond_atom_site_label_2 
 _geom_bond_distance 
 _geom_bond_site_symmetry_2 
 _geom_bond_publ_flag 
Pd1 C17 1.993(5) . ? 
Pd1 N1 2.091(3) . ? 
Pd1 O1B 2.234(4) . ? 
Pd1 O1 2.234(9) . ? 
Pd1 P1 2.2422(11) . ? 
P1 C27 1.823(16) . ? 
P1 C24B 1.824(7) . ? 
P1 C24 1.825(11) . ? 
P1 C23 1.832(6) . ? 
P1 C27B 1.91(3) . ? 
N1 C11 1.374(8) . ? 
N1 C5 1.388(8) . ? 
O1 C1 1.447(17) . ? 
O1 C4 1.467(18) . ? 
C1 C2 1.446(19) . ? 
C1 H1A 0.9900 . ? 
C1 H1B 0.9900 . ? 
C2 C3 1.50(2) . ? 
C2 H2A 0.9900 . ? 
C2 H2B 0.9900 . ? 
C3 C4 1.43(2) . ? 
C3 H3A 0.9900 . ? 
C3 H3B 0.9900 . ? 
C4 H4A 0.9900 . ? 
C4 H4B 0.9900 . ? 
O1B C1B 1.445(7) . ? 
O1B C4B 1.464(7) . ? 
C1B C2B 1.449(9) . ? 
C1B H1C 0.9900 . ? 
C1B H1D 0.9900 . ? 
C2B C3B 1.510(10) . ? 
C2B H2C 0.9900 . ? 
C2B H2D 0.9900 . ? 
C3B C4B 1.443(10) . ? 
C3B H3C 0.9900 . ? 
C3B H3D 0.9900 . ? 
C4B H4C 0.9900 . ? 
C4B H4D 0.9900 . ? 
C5 C6 1.389(7) . ? 
C5 C10 1.395(8) . ? 
C6 C7 1.390(7) . ? 
C6 H6A 0.9500 . ? 
C7 C8 1.366(8) . ? 
C7 H7A 0.9500 . ? 
C8 C9 1.373(8) . ? 
C8 H8A 0.9500 . ? 
C9 C10 1.377(8) . ? 
C9 H9A 0.9500 . ? 
C10 H10A 0.9500 . ? 
C11 C12 1.397(7) . ? 
C11 C16 1.400(7) . ? 
C12 C13 1.349(8) . ? 
C12 H12A 0.9500 . ? 
C13 C14 1.371(7) . ? 
C13 H13A 0.9500 . ? 
C14 C15 1.352(7) . ? 
C14 H14A 0.9500 . ? 
C15 C16 1.367(7) . ? 
C15 H15A 0.9500 . ? 
C16 H16A 0.9500 . ? 
C17 C18 1.395(6) . ? 
C17 C22 1.407(6) . ? 
C18 C19 1.393(7) . ? 
C18 C23 1.490(7) . ? 
C19 C20 1.369(7) . ? 
C19 H19A 0.9500 . ? 
C20 C21 1.366(7) . ? 
C20 H20A 0.9500 . ? 
C21 C22 1.386(7) . ? 
C21 H21A 0.9500 . ? 
C22 H22A 0.9500 . ? 
C23 H23A 0.9900 . ? 
C23 H23B 0.9900 . ? 
C24 C25 1.55(2) . ? 
C24 C26 1.559(19) . ? 
C24 H24A 1.0000 . ? 
C25 H25A 0.9800 . ? 
C25 H25B 0.9800 . ? 
C25 H25C 0.9800 . ? 
C26 H26A 0.9800 . ? 
C26 H26B 0.9800 . ? 
C26 H26C 0.9800 . ? 
C24B C25B 1.545(11) . ? 
C24B C26B 1.556(10) . ? 
C24B H24B 1.0000 . ? 
C25B H25D 0.9800 . ? 
C25B H25E 0.9800 . ? 
C25B H25F 0.9800 . ? 
C26B H26D 0.9800 . ? 
C26B H26E 0.9800 . ? 
C26B H26F 0.9800 . ? 
C27 C28 1.515(11) . ? 
C27 C29 1.541(10) . ? 
C27 C30 1.546(12) . ? 
C28 H28A 0.9800 . ? 
C28 H28B 0.9800 . ? 
C28 H28C 0.9800 . ? 
C29 H29A 0.9800 . ? 
C29 H29B 0.9800 . ? 
C29 H29C 0.9800 . ? 
C30 H30A 0.9800 . ? 
C30 H30B 0.9800 . ? 
C30 H30C 0.9800 . ? 
C27B C28B 1.517(17) . ? 
C27B C29B 1.546(16) . ? 
C27B C30B 1.554(17) . ? 
C28B H28D 0.9800 . ? 
C28B H28E 0.9800 . ? 
C28B H28F 0.9800 . ? 
C29B H29D 0.9800 . ? 
C29B H29E 0.9800 . ? 
C29B H29F 0.9800 . ? 
C30B H30D 0.9800 . ? 
C30B H30E 0.9800 . ? 
C30B H30F 0.9800 . ? 
 
loop_ 
 _geom_angle_atom_site_label_1 
 _geom_angle_atom_site_label_2 
 _geom_angle_atom_site_label_3 
 _geom_angle 
 _geom_angle_site_symmetry_1 
 _geom_angle_site_symmetry_3 
 _geom_angle_publ_flag 
C17 Pd1 N1 93.69(19) . . ? 
C17 Pd1 O1B 179.4(3) . . ? 
N1 Pd1 O1B 85.8(3) . . ? 
C17 Pd1 O1 176.6(17) . . ? 
N1 Pd1 O1 87.4(13) . . ? 
O1B Pd1 O1 3.3(19) . . ? 
C17 Pd1 P1 82.23(14) . . ? 
N1 Pd1 P1 175.92(17) . . ? 
O1B Pd1 P1 98.3(3) . . ? 
O1 Pd1 P1 96.7(13) . . ? 
C27 P1 C24B 107.4(6) . . ? 
C27 P1 C24 111(3) . . ? 
C27 P1 C23 104.4(5) . . ? 
C24B P1 C23 106.9(5) . . ? 
C24 P1 C23 105(2) . . ? 
C24B P1 C27B 106.2(8) . . ? 
C24 P1 C27B 109(3) . . ? 
C23 P1 C27B 105.4(8) . . ? 
C27 P1 Pd1 120.2(3) . . ? 
C24B P1 Pd1 114.5(6) . . ? 
C24 P1 Pd1 113(3) . . ? 
C23 P1 Pd1 102.05(19) . . ? 
C27B P1 Pd1 120.6(6) . . ? 
C11 N1 C5 122.0(3) . . ? 
C11 N1 Pd1 122.1(4) . . ? 
C5 N1 Pd1 115.9(4) . . ? 
C1 O1 C4 107.0(16) . . ? 
C1 O1 Pd1 129(4) . . ? 
C4 O1 Pd1 112(4) . . ? 
C2 C1 O1 105.5(17) . . ? 
C2 C1 H1A 110.7 . . ? 
O1 C1 H1A 110.7 . . ? 
C2 C1 H1B 110.7 . . ? 
O1 C1 H1B 110.7 . . ? 
H1A C1 H1B 108.8 . . ? 
C1 C2 C3 105.7(19) . . ? 
C1 C2 H2A 110.6 . . ? 
C3 C2 H2A 110.6 . . ? 
C1 C2 H2B 110.6 . . ? 
C3 C2 H2B 110.6 . . ? 
H2A C2 H2B 108.7 . . ? 
C4 C3 C2 101(2) . . ? 
C4 C3 H3A 111.6 . . ? 
C2 C3 H3A 111.6 . . ? 
C4 C3 H3B 111.6 . . ? 
C2 C3 H3B 111.6 . . ? 
H3A C3 H3B 109.4 . . ? 
C3 C4 O1 106(2) . . ? 
C3 C4 H4A 110.6 . . ? 
O1 C4 H4A 110.6 . . ? 
C3 C4 H4B 110.6 . . ? 
O1 C4 H4B 110.6 . . ? 
H4A C4 H4B 108.7 . . ? 
C1B O1B C4B 107.0(5) . . ? 
C1B O1B Pd1 119.2(7) . . ? 
C4B O1B Pd1 119.1(7) . . ? 
O1B C1B C2B 106.2(6) . . ? 
O1B C1B H1C 110.5 . . ? 
C2B C1B H1C 110.5 . . ? 
O1B C1B H1D 110.5 . . ? 
C2B C1B H1D 110.5 . . ? 
H1C C1B H1D 108.7 . . ? 
C1B C2B C3B 105.6(6) . . ? 
C1B C2B H2C 110.6 . . ? 
C3B C2B H2C 110.6 . . ? 
C1B C2B H2D 110.6 . . ? 
C3B C2B H2D 110.6 . . ? 
H2C C2B H2D 108.8 . . ? 
C4B C3B C2B 101.1(7) . . ? 
C4B C3B H3C 111.6 . . ? 
C2B C3B H3C 111.6 . . ? 
C4B C3B H3D 111.6 . . ? 
C2B C3B H3D 111.6 . . ? 
H3C C3B H3D 109.4 . . ? 
C3B C4B O1B 107.2(6) . . ? 
C3B C4B H4C 110.3 . . ? 
O1B C4B H4C 110.3 . . ? 
C3B C4B H4D 110.3 . . ? 
O1B C4B H4D 110.3 . . ? 
H4C C4B H4D 108.5 . . ? 
N1 C5 C6 120.0(4) . . ? 
N1 C5 C10 124.6(6) . . ? 
C6 C5 C10 115.3(5) . . ? 
C7 C6 C5 122.1(5) . . ? 
C7 C6 H6A 118.9 . . ? 
C5 C6 H6A 118.9 . . ? 
C8 C7 C6 120.6(6) . . ? 
C8 C7 H7A 119.7 . . ? 
C6 C7 H7A 119.7 . . ? 
C7 C8 C9 118.9(5) . . ? 
C7 C8 H8A 120.5 . . ? 
C9 C8 H8A 120.5 . . ? 
C8 C9 C10 120.2(6) . . ? 
C8 C9 H9A 119.9 . . ? 
C10 C9 H9A 119.9 . . ? 
C9 C10 C5 122.9(7) . . ? 
C9 C10 H10A 118.6 . . ? 
C5 C10 H10A 118.6 . . ? 
N1 C11 C12 124.8(5) . . ? 
N1 C11 C16 118.9(4) . . ? 
C12 C11 C16 116.2(5) . . ? 
C13 C12 C11 121.6(6) . . ? 
C13 C12 H12A 119.2 . . ? 
C11 C12 H12A 119.2 . . ? 
C12 C13 C14 121.6(5) . . ? 
C12 C13 H13A 119.2 . . ? 
C14 C13 H13A 119.2 . . ? 
C15 C14 C13 117.9(5) . . ? 
C15 C14 H14A 121.1 . . ? 
C13 C14 H14A 121.1 . . ? 
C14 C15 C16 122.3(5) . . ? 
C14 C15 H15A 118.8 . . ? 
C16 C15 H15A 118.8 . . ? 
C15 C16 C11 120.4(5) . . ? 
C15 C16 H16A 119.8 . . ? 
C11 C16 H16A 119.8 . . ? 
C18 C17 C22 117.4(5) . . ? 
C18 C17 Pd1 120.8(4) . . ? 
C22 C17 Pd1 121.6(4) . . ? 
C19 C18 C17 120.0(5) . . ? 
C19 C18 C23 120.5(5) . . ? 
C17 C18 C23 119.5(5) . . ? 
C20 C19 C18 121.4(5) . . ? 
C20 C19 H19A 119.3 . . ? 
C18 C19 H19A 119.3 . . ? 
C21 C20 C19 119.7(5) . . ? 
C21 C20 H20A 120.1 . . ? 
C19 C20 H20A 120.1 . . ? 
C20 C21 C22 120.1(5) . . ? 
C20 C21 H21A 119.9 . . ? 
C22 C21 H21A 119.9 . . ? 
C21 C22 C17 121.3(5) . . ? 
C21 C22 H22A 119.3 . . ? 
C17 C22 H22A 119.3 . . ? 
C18 C23 P1 105.7(4) . . ? 
C18 C23 H23A 110.6 . . ? 
P1 C23 H23A 110.6 . . ? 
C18 C23 H23B 110.6 . . ? 
P1 C23 H23B 110.6 . . ? 
H23A C23 H23B 108.7 . . ? 
C25 C24 C26 108(2) . . ? 
C25 C24 P1 132(6) . . ? 
C26 C24 P1 107(4) . . ? 
C25 C24 H24A 102.1 . . ? 
C26 C24 H24A 102.1 . . ? 
P1 C24 H24A 102.1 . . ? 
C25B C24B C26B 107.5(9) . . ? 
C25B C24B P1 109.3(11) . . ? 
C26B C24B P1 111.1(10) . . ? 
C25B C24B H24B 109.6 . . ? 
C26B C24B H24B 109.6 . . ? 
P1 C24B H24B 109.6 . . ? 
C24B C25B H25D 109.5 . . ? 
C24B C25B H25E 109.5 . . ? 
H25D C25B H25E 109.5 . . ? 
C24B C25B H25F 109.5 . . ? 
H25D C25B H25F 109.5 . . ? 
H25E C25B H25F 109.5 . . ? 
C24B C26B H26D 109.5 . . ? 
C24B C26B H26E 109.5 . . ? 
H26D C26B H26E 109.5 . . ? 
C24B C26B H26F 109.5 . . ? 
H26D C26B H26F 109.5 . . ? 
H26E C26B H26F 109.5 . . ? 
C28 C27 C29 110.3(8) . . ? 
C28 C27 C30 108.7(7) . . ? 
C29 C27 C30 108.5(7) . . ? 
C28 C27 P1 107.6(9) . . ? 
C29 C27 P1 108.6(9) . . ? 
C30 C27 P1 113.2(11) . . ? 
C28B C27B C29B 109.6(13) . . ? 
C28B C27B C30B 109.0(12) . . ? 
C29B C27B C30B 107.6(12) . . ? 
C28B C27B P1 106.0(16) . . ? 
C29B C27B P1 118.3(19) . . ? 
C30B C27B P1 106(2) . . ? 
C27B C28B H28D 109.5 . . ? 
C27B C28B H28E 109.5 . . ? 
H28D C28B H28E 109.5 . . ? 
C27B C28B H28F 109.5 . . ? 
H28D C28B H28F 109.5 . . ? 
H28E C28B H28F 109.5 . . ? 
C27B C29B H29D 109.5 . . ? 
C27B C29B H29E 109.5 . . ? 
H29D C29B H29E 109.5 . . ? 
C27B C29B H29F 109.5 . . ? 
H29D C29B H29F 109.5 . . ? 
H29E C29B H29F 109.5 . . ? 
C27B C30B H30D 109.5 . . ? 
C27B C30B H30E 109.5 . . ? 
H30D C30B H30E 109.5 . . ? 
C27B C30B H30F 109.5 . . ? 
H30D C30B H30F 109.5 . . ? 
H30E C30B H30F 109.5 . . ? 
 
_diffrn_measured_fraction_theta_max    0.999 
_diffrn_reflns_theta_full              25.38 
_diffrn_measured_fraction_theta_full   0.999 
_refine_diff_density_max    0.463 
_refine_diff_density_min   -0.404 
_refine_diff_density_rms    0.072 
_publ_requested_category         FM 
 
_publ_section_references 
; 
Bruker (2004). APEX2. Bruker AXS, Inc., Madison, Wisconsin, USA. 
 
Bruker (2005). SAINT, SHELXTL, XCIF, XPREP.  Bruker AXS, Inc., Madison, 
Wisconsin, USA. 
 
Bruker (2007).  SADABS, TWINABS. Bruker AXS, Inc., Madison, Wisconsin, USA. 
 
CrystalMaker (1994).  CrystalMaker, a crystal and molecular structures 
program for Mac and Windows. CrystalMaker Software Ltd., Oxford, England 
(www.crystalmaker.com). 
 
Flack, H. D. (1983), Acta Cryst. A39, 876-881. 
Flack, H. D. (2000), J. Appl. Cryst., 33, 1143-1148. 
 
Sheldrick, G.M. (2008). Acta Cryst. A64, 112-122 
; 
 
_publ_section_figure_captions 
; 
Figure 1.  SHELXTL (Bruker, 2005) plot showing 35% probability ellipsoids 
for non-H atoms and circles of arbitrary size for H atoms. 
; 
 
_publ_section_exptl_prep 
; 
Crystals were grown from a mixture of THF and Pentane. 
; 
 
_publ_section_exptl_refinement 
; 
A structural model consisting of the host molecule was developed. Disorder 
was modeled in two ligands of the host molecule.  The disorder occured in 
the THF ligand and in the two alkyl arms off of the phosphorus atom. This 
model converged with wR2 = 0.0773 and R1 = 0.0387 for 428 parameters with 
370 restraints against 4958 data. Distances between atom pairs were 
restrained to possess the same value (esd 0.02). Similar distances 
(esd 0.01) were used between atom pairs linking the disordered and 
ordered portions of the molecule. Rigid-bond restraints (esd 0.01) 
were imposed on displacement parameters for all disordered sites 
and similar displacement amplitudes  (esd 0.01) were imposed on disordered 
sites overlapping by less than the sum of van der Waals radii. Methyl H atom 
positions, R-CH~3~, were optimized by rotation about R-C bonds with idealized 
C-H, R--H and H--H distances. Remaining H atoms were included as riding idealize 
contributors.  Methyl H atom U's were assigned as 1.5 times U~eq~ of the carrier 
atom; remaining H atom U's were assigned as 1.2 times carrier U~eq~. On the 
basis of 2333 unmerged Friedel opposites, the fractional contribution 
of the racemic twin was negligible (Flack, 1983 & 2000). 
; 
 
_publ_contact_author 
; 
Danielle L. Gray 
University of Illinois 
School of Chemical Sciences, Box 59-1 
505 South Mathews Avenue 
Urbana, Illinois  61801 
USA 
; 
_publ_contact_author_phone        '1  217 244 1708' 
_publ_contact_author_fax          '1  217 244 8068' 
_publ_contact_author_email        dgray@illinois.edu 
_publ_contact_letter 
; 
Please consider this CIF submission for publication as a structural paper 
in Acta Crystallographica E. 
; 
_publ_requested_journal           'Acta Crystallographica E' 
_publ_requested_coeditor_name     ? 
 
_publ_section_title 
; 
 ? 
; 
 
_publ_section_abstract 
; 
 ? 
; 
 
_publ_section_comment 
; 
 ? 
; 
 
_publ_section_acknowledgements 
; 
The Materials Chemistry Laboratory at the University of Illinois was 
supported in part by grants NSF CHE 95-03145 and NSF CHE 03-43032 
from the National Science Foundation. 
; 
 
loop_ 
 _publ_author_name 
 _publ_author_address 
'Gray, Danielle L.' 
; 
University of Illinois 
School of Chemical Sciences, Box 59-1 
505 South Mathews Avenue 
Urbana, Illinois  61801 
USA 
; 
'Fuller, Amy L.' 
; 
University of Illinois 
School of Chemical Sciences, Box 59-1 
505 South Mathews Avenue 
Urbana, Illinois  61801 
USA 
; 
'Gao, Yi-Gui' 
; 
University of Illinois 
School of Chemical Sciences, Box 59-1 
505 South Mathews Avenue 
Urbana, Illinois  61801 
USA 
; 
 
loop_ 
 _exptl_crystal_face_index_h 
 _exptl_crystal_face_index_k 
 _exptl_crystal_face_index_l 
 _exptl_crystal_face_perp_dist 
    1.00    1.00    1.00    0.0660 
   -1.00   -1.00   -1.00    0.0690 
   -1.00    0.00    0.00    0.0140 
    1.00    0.00    0.00    0.0460 
   -1.00    1.00   -1.00    0.0590 
   -1.00    0.00    1.00    0.0720 
    1.00    0.00   -1.00    0.0970 
    0.00   -1.00    1.00    0.0650 
    1.00   -1.00   -1.00    0.0620 
